# Supplementary material for: MoS2/NiSe2/rGO Multiple-Interfaced Sandwich-like Nanostructures as Efficient Electrocatalysts for Overall Water Splitting
Source: MDPI journal article supplement (doi:10.3390/nano13040752), 2023-02-16
Supplement: s1 [file s1]

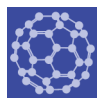

## Supplementary Materials

# MoS<sub>2</sub>/NiSe<sub>2</sub>/rGO Multiple-Interfaced Sandwich-like Nanostructures as Efficient Electrocatalysts for Overall Water Splitting

Xiaoyan Bai <sup>1,†</sup>, Tianqi Cao <sup>1,†</sup>, Tianyu Xia <sup>1,\*</sup>, Chenxiao Wu <sup>1</sup>, Menglin Feng <sup>1</sup>, Xinru Li <sup>1</sup>, Ziqing Mei <sup>1</sup>, Han Gao <sup>1</sup>, Dongyu Huo <sup>1</sup>, Xiaoyan Ren <sup>1</sup>, Shunfang Li <sup>1</sup>, Haizhong Guo <sup>1,\*</sup> and Rongming Wang <sup>2,\*</sup>

<sup>1</sup> Key Laboratory of Materials Physics, Ministry of Education, School of Physics and Microelectronics, Zhengzhou University, Zhengzhou 450052, China; xy11abai@163.com (X.B.); tqcao123@163.com (T.C.); w\_chenxiao@163.com (C.W.); fengmenglin0126@163.com (M.F.); xinrulizk@163.com (X.L.); mzzq6667@163.com (Z.M.); hgao@zzu.edu.cn (Han Gao); huodongyu@gs.zzu.edu.cn (D.H.); renxian@zzu.edu.cn (X.R.); sflizzu@zzu.edu.cn (S.L.)

<sup>2</sup> Beijing Advanced Innovation Center for Materials Genome Engineering, Beijing Key Laboratory for Magneto-Photoelectrical Composite and Interface Science, School of Mathematics and Physics, University of Science and Technology Beijing, Beijing 100083, China

\* Correspondence: tyxia@zzu.edu.cn (T.X.); hguo@zzu.edu.cn (Haizhong Guo); rmwang@ustb.edu.cn (R.W.)

† These authors contributed equally to this work.

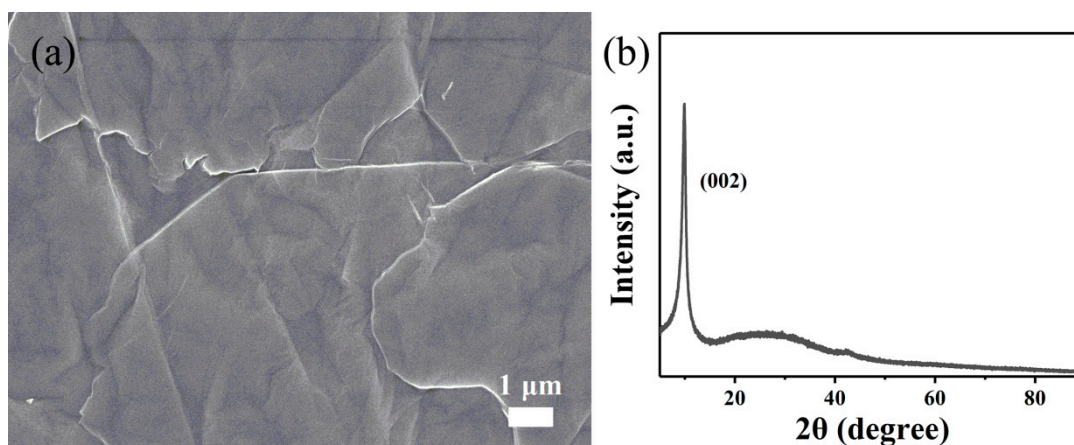

Figure S1. (a) SEM image and (b) XRD pattern of the graphene oxide (GO).

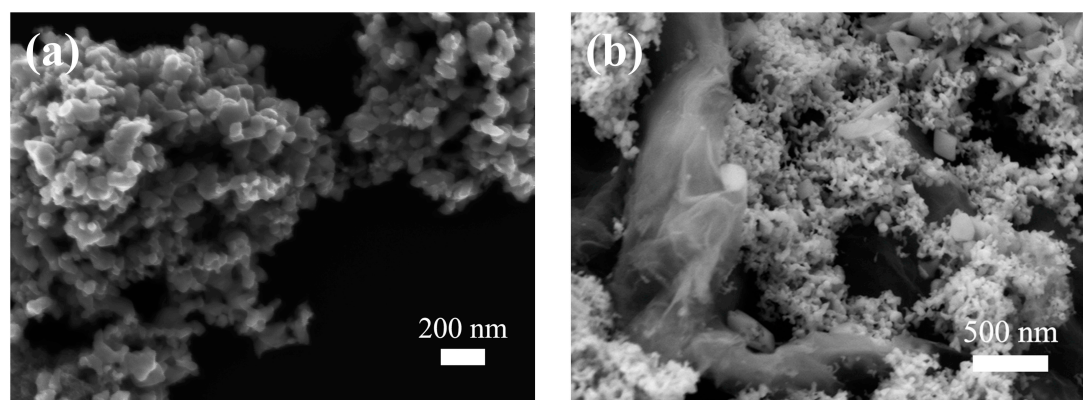

Figure S2. SEM images of (a) NiSe<sub>2</sub> and (b) NiSe<sub>2</sub>/rGO.

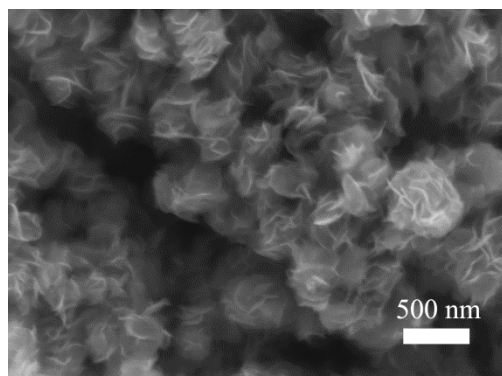

**Figure S3.** SEM image of the pure MoS<sub>2</sub>.

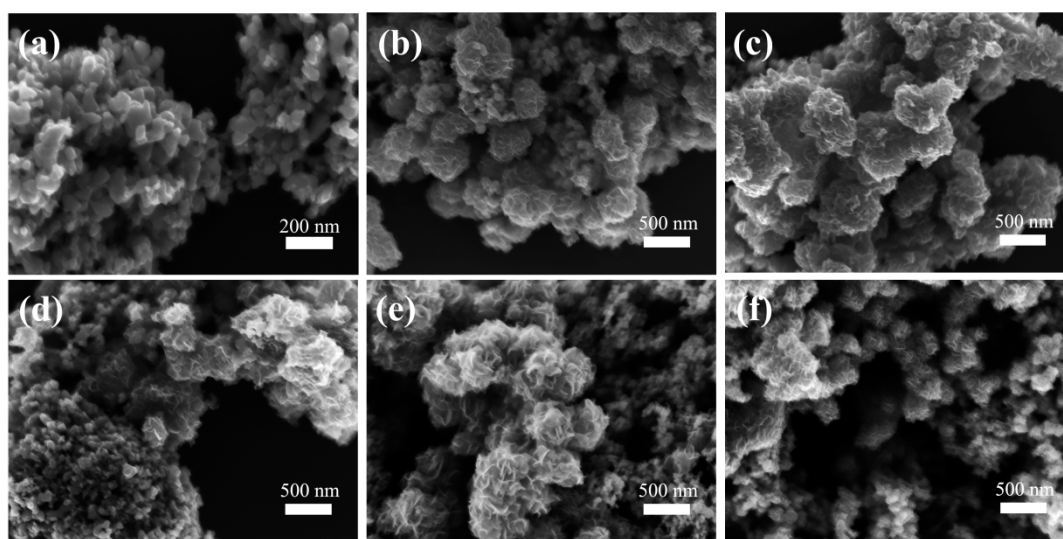

**Figure S4.** SEM images of (a) NiSe<sub>2</sub>, (b) MoS<sub>2</sub>/NiSe<sub>2</sub>-1, (c) MoS<sub>2</sub>/NiSe<sub>2</sub>, (d) MoS<sub>2</sub>/NiSe<sub>2</sub>-2, (e) MoS<sub>2</sub>/NiSe<sub>2</sub>/rGO-1, and (f) MoS<sub>2</sub>/NiSe<sub>2</sub>/rGO-2.

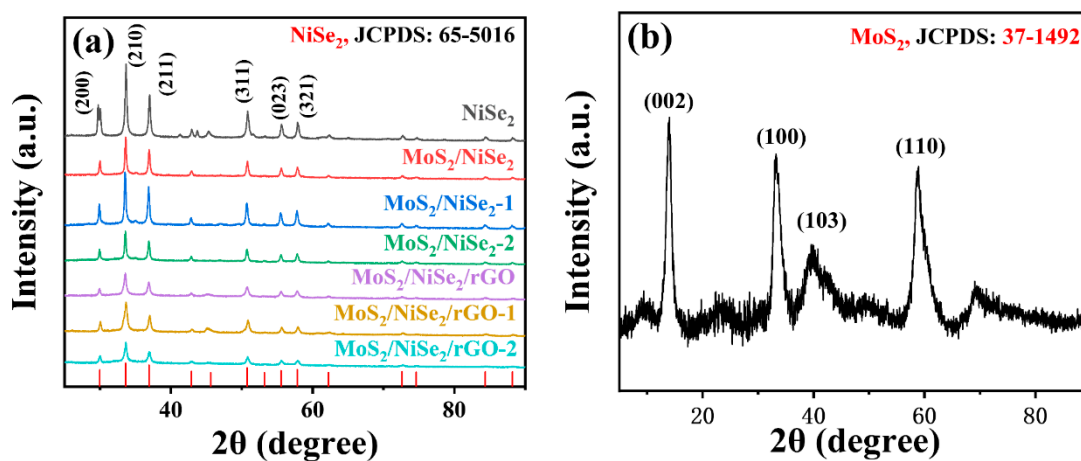

**Figure S5.** XRD patterns of (a) NiSe<sub>2</sub>, MoS<sub>2</sub>/NiSe<sub>2</sub>, MoS<sub>2</sub>/NiSe<sub>2</sub>-1, MoS<sub>2</sub>/NiSe<sub>2</sub>-2, MoS<sub>2</sub>/NiSe<sub>2</sub>/rGO, MoS<sub>2</sub>/NiSe<sub>2</sub>/rGO-1, MoS<sub>2</sub>/NiSe<sub>2</sub>/rGO-2 and (b) the pure MoS<sub>2</sub>.

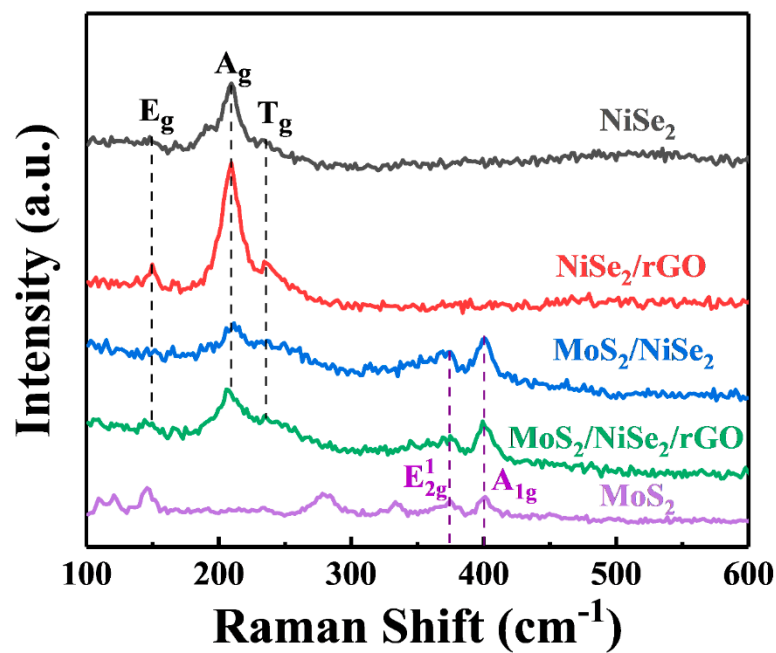

Figure S6. Raman spectra of NiSe<sub>2</sub>, NiSe<sub>2</sub>/rGO, MoS<sub>2</sub>/NiSe<sub>2</sub>, MoS<sub>2</sub>/NiSe<sub>2</sub>/rGO and MoS<sub>2</sub>.

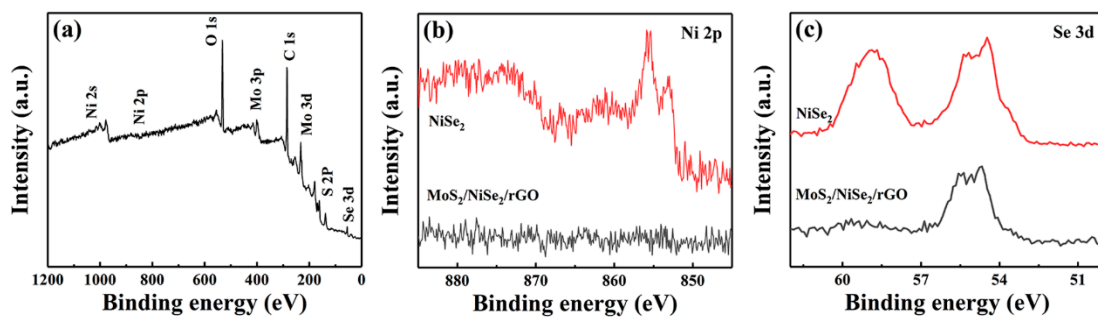

Figure S7. (a) XPS survey spectra. (b) Ni 2p and (c) Se 3d high resolution spectrum of MoS<sub>2</sub>/NiSe<sub>2</sub>/rGO, respectively.

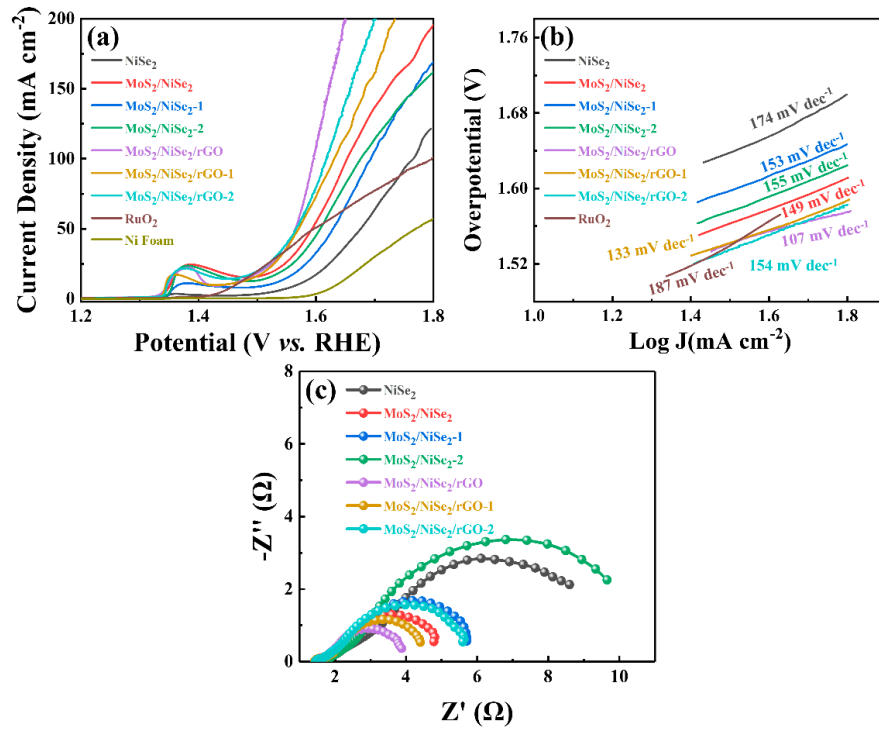

**Figure S8.** (a) Polarization curves (iR-corrected) at a scan rate of  $2 \text{ mV s}^{-1}$  of  $\text{NiSe}_2$ ,  $\text{MoS}_2/\text{NiSe}_2$ ,  $\text{MoS}_2/\text{NiSe}_2\text{-1}$ ,  $\text{MoS}_2/\text{NiSe}_2\text{-2}$ ,  $\text{MoS}_2/\text{NiSe}_2/\text{rGO}$ ,  $\text{MoS}_2/\text{NiSe}_2/\text{rGO-1}$ ,  $\text{MoS}_2/\text{NiSe}_2/\text{rGO-2}$ ,  $\text{RuO}_2$  and Ni foam, respectively. (The overall thickness, porosity, thread thickness, and pore density of Ni foam is 0.3 mm, 96%, 40–100  $\mu\text{m}$ , and 110 PPI, respectively.) (b) Tafel plots of a series of samples. (c) Nyquist plots at an overpotential of 300 mV.

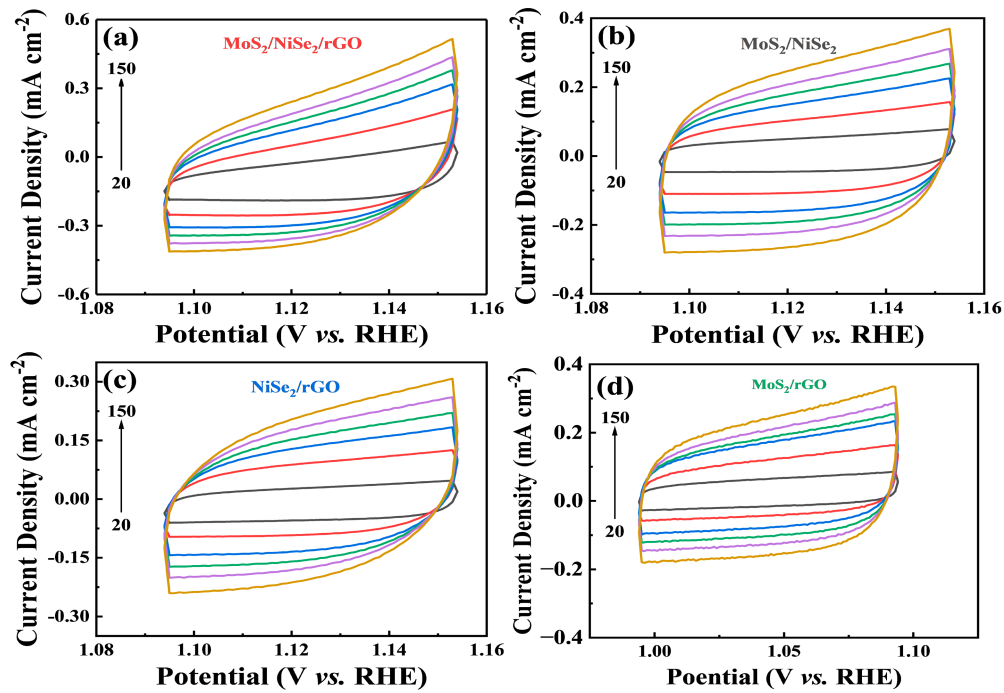

**Figure S9.** CV curves for (a)  $\text{MoS}_2/\text{NiSe}_2/\text{rGO}$ , (b)  $\text{MoS}_2/\text{NiSe}_2$ , (c)  $\text{NiSe}_2/\text{rGO}$ , (d)  $\text{MoS}_2/\text{rGO}$  with various scan rates (20, 50, 80, 100, 120, 150  $\text{mV S}^{-1}$ ).



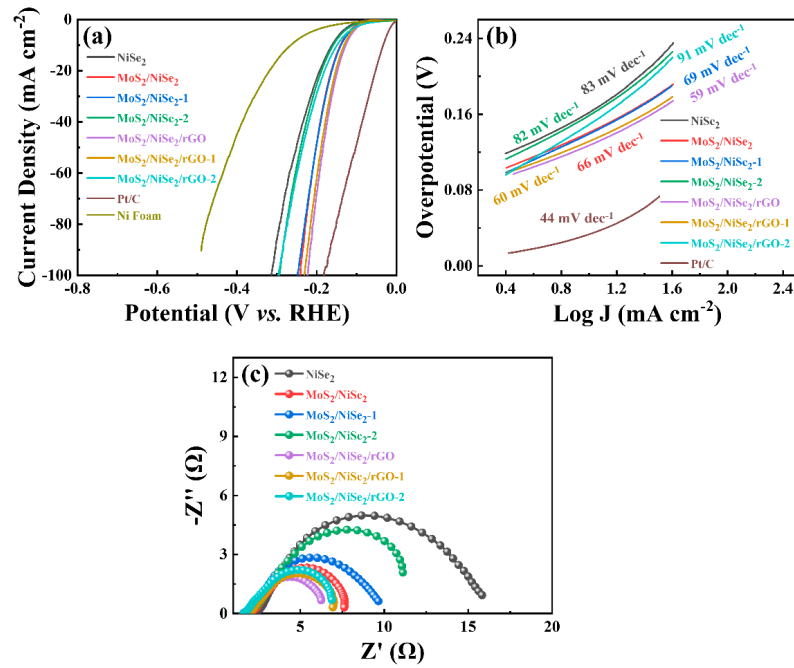

**Figure S10.** (a) Polarization curves (iR-corrected) at a scan rate of 5 mV s<sup>-1</sup> of NiSe<sub>2</sub>, MoS<sub>2</sub>/NiSe<sub>2</sub>, MoS<sub>2</sub>/NiSe<sub>2</sub>-1, MoS<sub>2</sub>/NiSe<sub>2</sub>-2, MoS<sub>2</sub>/NiSe<sub>2</sub>/rGO, MoS<sub>2</sub>/NiSe<sub>2</sub>/rGO-1, MoS<sub>2</sub>/NiSe<sub>2</sub>/rGO-2, Pt/C and Ni foam, respectively. (b) Tafel plots of a series of samples. (c) Nyquist plots at an overpotential of 120 mV.

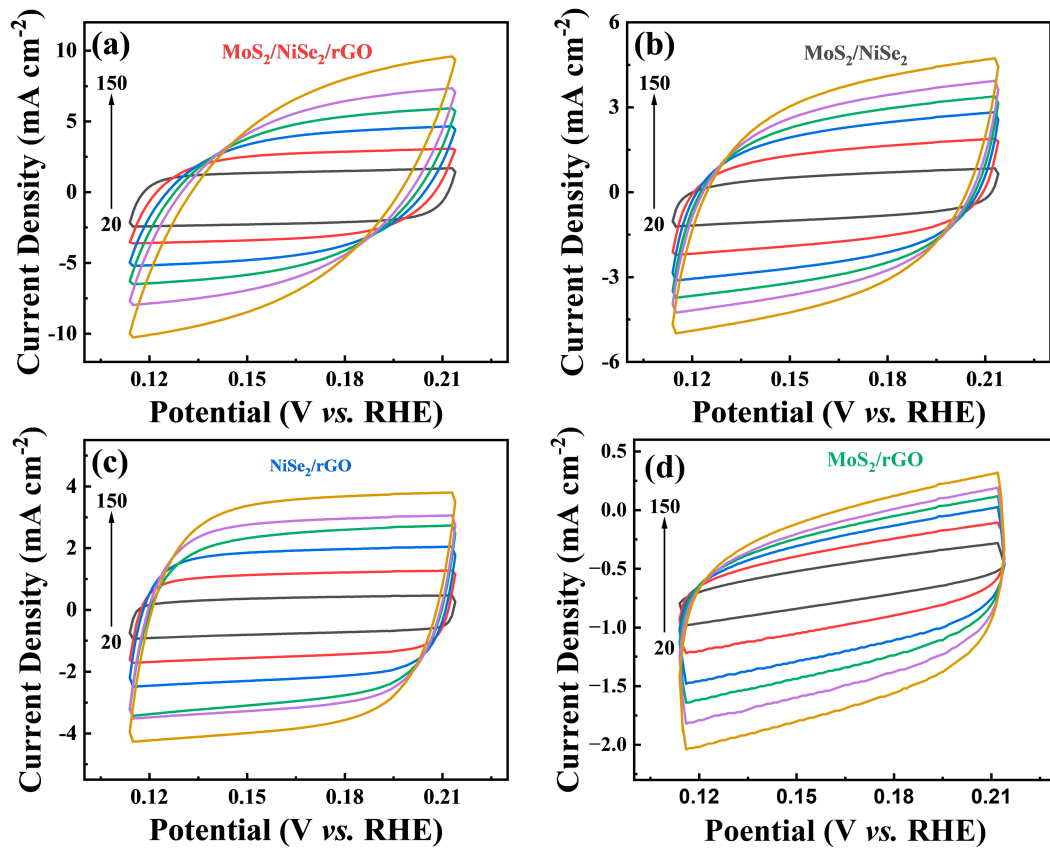

**Figure S11.** CV curves for (a) MoS<sub>2</sub>/NiSe<sub>2</sub>/rGO, (b) MoS<sub>2</sub>/NiSe<sub>2</sub>, (c) NiSe<sub>2</sub>/rGO, (d) MoS<sub>2</sub>/rGO with various scan rates (20, 50, 80, 100, 120, 150 mV S<sup>-1</sup>).

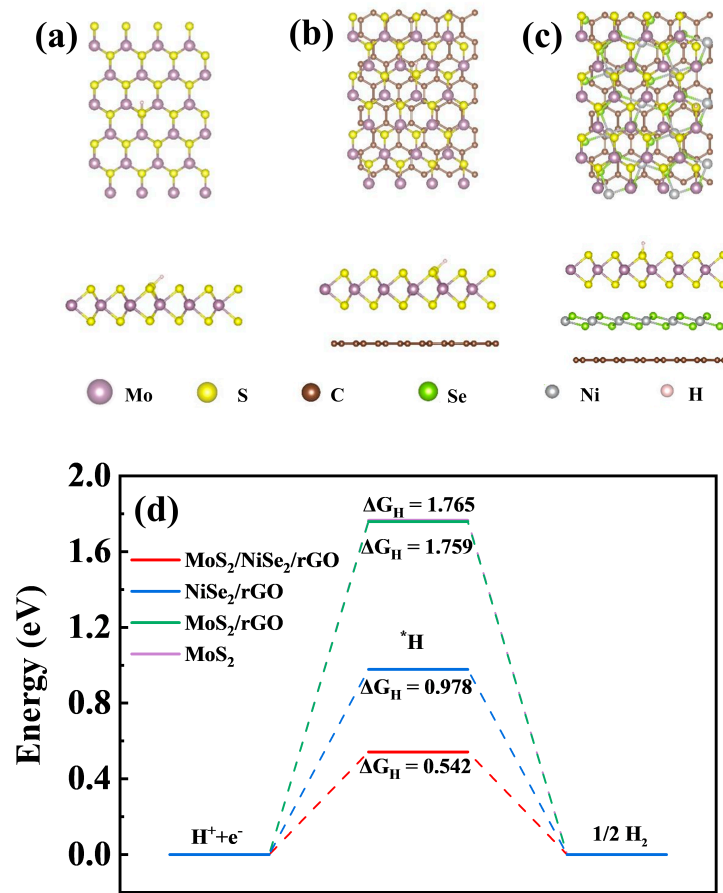

**Figure S12.** Optimized structural representations for hydrogen adsorption at (a) MoS<sub>2</sub>, (b) MoS<sub>2</sub>/rGO, (c) MoS<sub>2</sub>/NiSe<sub>2</sub>/rGO. Calculated free energy diagrams of the HER on MoS<sub>2</sub>, MoS<sub>2</sub>/rGO, NiSe<sub>2</sub>/rGO, and MoS<sub>2</sub>/NiSe<sub>2</sub>/rGO, respectively.

**DFT Calculation method:** The present first-principles density-functional theory (DFT) calculations were performed using the Vienna ab initio simulation package (VASP)<sup>[S1]</sup>. The generalized gradient approximation (GGA) with revised-Perdew–Burke–Ernzerhof (RPBE) was applied for the exchange–correlation functionals<sup>[S2]</sup>. The wave functions were employed in a plane wave basis set with an energy cutoff of 400 eV. The convergence criterion for the self-consistency process was set to 10<sup>-4</sup> eV between two ionic steps. During the structural relaxations, all atoms are fully relaxed until the residual forces on each direction are smaller than 0.02 eV/Å. The zero damping DFT-D3 method of Grimme<sup>[S3]</sup> was adopted in describing van der Waals interactions. To minimize the lattice mismatch, the periodic supercell slab models were constructed among a 4×6√3 MoS<sub>2</sub>, a 2 × 3 NiSe<sub>2</sub> and a 6 × 8√3 graphene monolayer with a 2 × 2 × 1 k-point mesh. All the slab models were separated by a vacuum of 15 Å thickness to ensure decoupling between neighboring slabs.

The Gibbs free energy change for each elemental step of the HER was calculated based on the computational hydrogen electrode (CHE) model<sup>[S4]</sup> proposed by Nørskov et al., expressed as:

$$\Delta G = \Delta E + \Delta E_{ZPE} - T\Delta S \quad (1)$$

Where  $\Delta E$ ,  $\Delta E_{\text{ZPE}}$ , and  $\Delta S$  are the energy obtained directly from DFT calculations, change in zero-point energy, and change in entropy terms, respectively, with temperature  $T=298.15$  K.

**Table S1.** Comparison of electrocatalytic performance of different catalysts in 1 M KOH electrolyte.

| Catalyst                                                      | Loading*<br>(mg cm <sup>-2</sup> ) | OER                                               | HER                                               | Overall                                | Ref.      |
|---------------------------------------------------------------|------------------------------------|---------------------------------------------------|---------------------------------------------------|----------------------------------------|-----------|
|                                                               |                                    | Overpotential @ j<br>(mV@10 mA cm <sup>-2</sup> ) | Overpotential @ j<br>(mV@10 mA cm <sup>-2</sup> ) | Voltage<br>(V@10 mA cm <sup>-2</sup> ) |           |
| MoS <sub>2</sub> /NiSe <sub>2</sub> /rGO                      | 4                                  | 230                                               | 127                                               | 1.52                                   | This work |
| Ni-Co-P hollow nanobricks                                     | 2                                  | 270                                               | 107                                               | 1.62                                   | S5        |
| Fe <sub>0.09</sub> Co <sub>0.13</sub> -NiSe <sub>2</sub> /CFC | --                                 | 251                                               | 92                                                | 1.52                                   | S6        |
| NiSe <sub>2</sub> /Ni foam                                    | 0.2                                | 235                                               | 166                                               | 1.64                                   | S7        |
| Ni <sub>3</sub> S <sub>2</sub> @NGCLs/NF                      | --                                 | 271                                               | 140                                               | 1.55                                   | S8        |
| NiMo-PVP                                                      | 0.5–0.6                            | 297                                               | 147                                               | 1.66                                   | S9        |
| N-NiMoO <sub>4</sub> /NiS <sub>2</sub>                        | 0.2                                | 283                                               | 99                                                | 1.60                                   | S10       |

\* The comparison catalysts are all non-precious metals, and this table can be used to measure the catalytic performance of the different catalysts without considering the small cost gap caused by the different loadings.

**Table S2.** Comparison of the electrocatalytic activity of MoS<sub>2</sub>/NiSe<sub>2</sub>/rGO with MoS<sub>2</sub>/rGO, NiSe<sub>2</sub>/rGO in 1 M KOH electrolyte.

| Catalyst                                 | OER / mV    |             |              | HER / mV    |             |              |
|------------------------------------------|-------------|-------------|--------------|-------------|-------------|--------------|
|                                          | $\eta_{20}$ | $\eta_{50}$ | $\eta_{100}$ | $\eta_{10}$ | $\eta_{50}$ | $\eta_{100}$ |
| MoS <sub>2</sub> /NiSe <sub>2</sub> /rGO | 277         | 335         | 367          | 127 mV      | 184         | 223          |
| MoS <sub>2</sub> /NiSe <sub>2</sub>      | 299         | 363         | 423          | 141         | 202         | 241          |
| NiSe <sub>2</sub> /rGO                   | 328         | 365         | 407          | 164         | 247         | 301          |
| MoS <sub>2</sub> /rGO                    | 390         | 460         | 490          | 259         | 346         | 374          |

## Reference

- [S1] Kresse, G.; Furthmüller, J., Efficient iterative schemes for ab initio total-energy calculations using a plane-wave basis set. *Phys. Rev. B* **1996**, *54*, 11169–11186.
- [S2] Hammer, B.; Hansen, L.; Nørskov, J., Improved adsorption energetics within density-functional theory using revised Perdew-Burke-Ernzerhof functionals. *Phys. Rev. B* **1999**, *59*, 7413–7421.
- [S3] Grimme, S., Semiempirical GGA-type density functional constructed with a long-range dispersion correction. *J. Comput. Chem.* **2006**, *27*, 1787–1799.
- [S4] Nørskov, J.; Bligaard, T.; Logadottir, A.; Kitchin, J.; Chen, J.; Pandalov, S.; Stimming, U., Trends in the exchange current for hydrogen evolution. *Phys. Inorg. Chem.* **2005**, *152*, J23–J26.
- [S5] Hu, E.; Feng, Y.; Nai, J.; Zhao, D.; Hu, Y.; Lou, X., Construction of hierarchical Ni-Co-P hollow nanobricks with oriented nanosheets for efficient overall water splitting. *Energy Environ. Sci.*, **2018**, *11*, 872–880.
- [S6] Sun, Y.; Xu, K.; Wei, Z.; Li, H.; Zhang, T.; Li, X.; Cai, W.; Ma, J.; Fan, H.; Li, Y., Strong electronic interaction in dual-cation-incorporated NiSe<sub>2</sub> Nanosheets with lattice distortion for highly efficient overall water splitting. *Adv. Mater.* **2018**, *30*, 1802121.
- [S7] Zhang, J.; Wang, Y.; Zhang, C.; Gao, H.; Lv, L.; Han, L.; Zhang, Z., Self-supported porous NiSe<sub>2</sub> nanowrinkles as efficient bifunctional electrocatalysts for overall water splitting. *ACS Sustainable Chem. Eng.* **2017**, *6*, 2231–2239.
- [S8] Li, B.; Li, Z.; Pang, Q.; Zhang, J., Core/shell cable-like Ni<sub>3</sub>S<sub>2</sub> nanowires/N-doped graphene-like carbon layers as composite electrocatalyst for overall electrocatalytic water splitting. *Chem. Eng. J.* **2020**, *401*, 126045.
- [S9] Zhang, Y.; Xia, X.; Cao, X.; Zhang, B.; Tiep, N.; He, H.; Chen, S.; Huang, Y.; Fan, H., Ultrafine metal nanoparticles/N-doped porous carbon hybrids coated on carbon fibers as flexible and binder-free water splitting catalysts. *Adv. Energy Mater.* **2017**, *7*, 1700220.
- [S10] An, L.; Feng, J.; Zhang, Y.; Wang, R.; Liu, H.; Wang, G.; Cheng, F.; Xi, P., Epitaxial heterogeneous interfaces on N-Ni-MoO<sub>4</sub>/NiS<sub>2</sub> nanowires/nanosheets to boost hydrogen and oxygen production for overall water splitting. *Adv. Funct. Mater.* **2019**, *29*, 1805298.
